# Supplementary material
Source: MDPI journal article supplement (https://www.mdpi.com/2073-4344/13/2/414)
Supplement: s1 [file s1]

# Operando Laboratory X-ray Absorption Spectroscopy and UV-Vis Study of Pt/TiO<sub>2</sub> Photocatalyst During Photodeposition and Hydrogen Evolution Reaction

Elizaveta G. Kozyr <sup>1,2</sup>, Peter N. Njoroge <sup>1</sup>, Sergei V. Chapek <sup>1</sup>, Viktor V. Shapovalov <sup>1</sup>, Alina A. Skorynina <sup>1</sup>, Anna Yu. Pnevskaya <sup>1</sup>, Alexey N. Bulgakov <sup>1</sup>, Alexander V. Soldatov <sup>1</sup>, Francesco Pellegrino <sup>2</sup>, Elena Groppo <sup>2</sup>, Silvia Bordiga <sup>2</sup>, Lorenzo Mino <sup>2</sup> and Aram L. Bugaev <sup>1,3,\*</sup>

## 1. Photocatalytic hydrogen evolution reaction (PHER)

Hydrogen production experiments were performed irradiating with UV light slurries containing 1.0 g·L<sup>-1</sup> of P25 TiO<sub>2</sub> powder of the materials and 2.0 mg·L<sup>-1</sup> of Pt photodeposited as Pt<sup>0</sup> onto TiO<sub>2</sub> upon UV irradiation. The use of a co-catalyst increases the photogenerated carrier separation improving the kinetics of H<sub>2</sub>O reduction, which would be very slow on the pristine TiO<sub>2</sub>. The experiments were carried out at pH 3.7 using formate buffer 0.1 M. Formate acts also as hole scavenger. The irradiation experiments were carried out in magnetically stirred, cylindrical quartz cells containing 5 mL of slurry (therefore 5 mg of material). Before irradiation the cell containing the slurry was carefully purged with nitrogen to remove oxygen from the reaction environment. The removal of oxygen is fundamental in order to avoid the competitive oxygen reduction reaction. Hydrogen and CO<sub>2</sub> evolution was followed sampling periodically 2.5 mL of gas from the irradiation cell and replacing it with the same volume of N<sub>2</sub>. The gas sample was analyzed with an Agilent 490 Micro GC gas chromatograph equipped with a Molsieve 5 Å column for H<sub>2</sub> analysis and a Poraplot U column for CO<sub>2</sub> quantitation. During the analysis the columns were kept at temperatures of 363 K and 313 K at a pressure of 200 kPa and 150 kPa, respectively. The carrier gases were argon and helium, respectively. The total amounts of H<sub>2</sub> and CO<sub>2</sub> produced as function of time were calculated from the concentration in the sampled gas, considering the total volume of gas in the irradiation cell and the previous samplings. The irradiation was carried out with a LED source centered at 365 nm with an irradiance of 40 W·m<sup>-2</sup>. As highlighted in Figure S1, the H<sub>2</sub> photoproduction had a linear trend in a 60 min test. As expected, the evolution rate for H<sub>2</sub> and CO<sub>2</sub> is the nearly the same due to the stoichiometric ratio in the formic acid photoreformig reaction, the slight difference (~6%) falls well within experimental error of this kind of experiments.

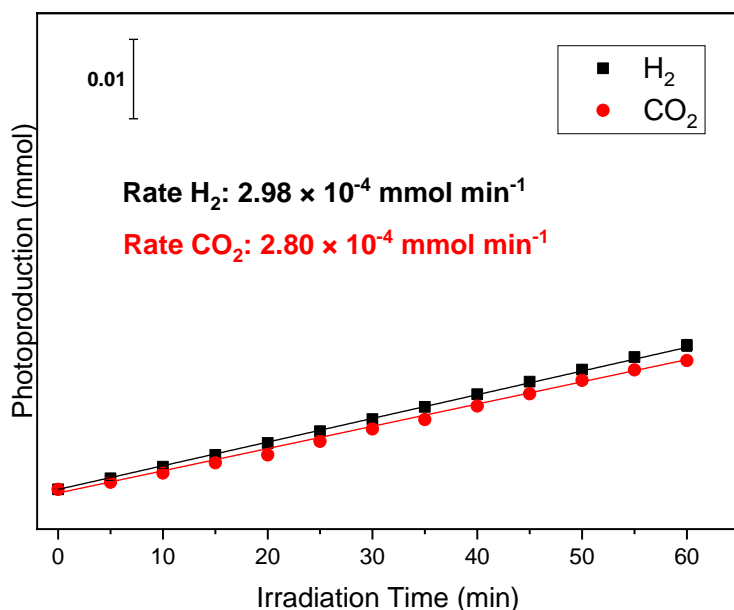

**Figure S1.** Formation of H<sub>2</sub> and CO<sub>2</sub> during PHER analyzed by GC.

## 2. Additional UV-Vis studies

To track the Pt photoreduction process in more detail we carried out an additional *in situ* UV-Vis experiments with better time-resolution (ca. 30 s per spectrum) without simultaneous XAS data collection. First, the photodeposition experiment was repeated with under similar experimental conditions as described in the main text, but to slow down the reduction of Pt<sup>4+</sup> species and monitor a gradual decrease of the corresponding peak in the UV-Vis spectra, the Pt concentration was lowered by the factor of 5, and the UV lamp was placed at 0.3 m distance from the cell. The obtained results (Figure S2a) also demonstrate a rapid decrease of the Pt<sup>4+</sup> signal already after 30 s of exposure (blue).

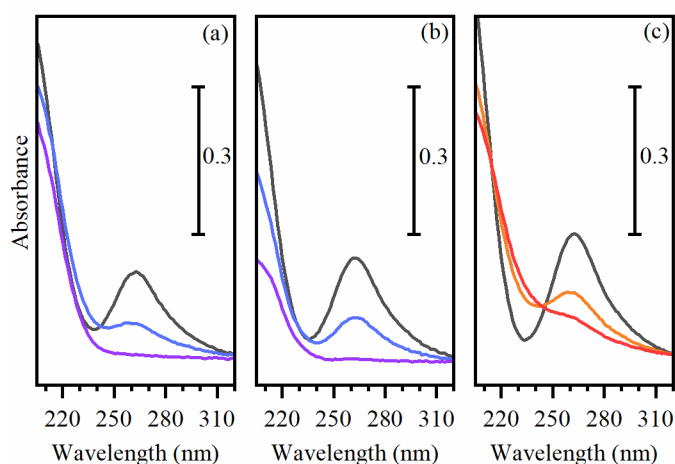

**Figure S2.** Evolution of UV-Vis spectra of the solution containing K<sub>2</sub>PtCl<sub>6</sub> upon UV irradiation. The K<sub>2</sub>PtCl<sub>6</sub> precursor was added to (a) a solution of water and formic acid (3:1) with TiO<sub>2</sub>, (b) a solution of water and formic acid (3:1) without TiO<sub>2</sub>, and (c) deionized water only. Initial states are shown by black lines, and the spectra taken after 30 s, 90 s, 5 min, and 15 min, are shown by blue, purple, orange, and red lines, respectively.

A second experiment was performed under similar conditions but omitting the addition of TiO<sub>2</sub>. The results (Figure S2b) are very similar to those obtained in presence of TiO<sub>2</sub>, indicating that the reduction of the K<sub>2</sub>PtCl<sub>6</sub> precursor

occurred exclusively due to UV irradiation, and interaction with TiO<sub>2</sub> is not necessary at this stage. This finding also explained why the reduction of the Pt<sup>4+</sup> precursor in solution, as monitored by UV-Vis spectroscopy, occurred before its deposition on TiO<sub>2</sub> as observed by XAS. However, we do not observe any evidence of the formation of Pt nanoparticles in the solution, which would give rise to a broad spectral feature in the UV-Vis spectra, arising from light scattering by the nanoparticles. Notably, although the reduction of Pt<sup>4+</sup> was observed also in the absence of TiO<sub>2</sub>, no signal of hydrogen production was observed for such sample. However, the CO<sub>2</sub> signal was observed in the beginning of the irradiation, indicating the oxidation of the formic acid (Figure S3).

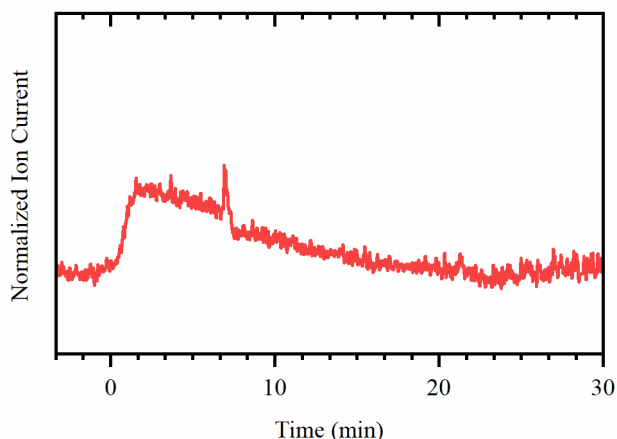

**Figure S3.** Normalized MS signal of  $m/Z = 44$  recorded during the UV irradiation of K<sub>2</sub>PtCl<sub>6</sub> dissolved in the solution of deionized water with formic acid (1:3) as in Figure 2d but without addition of TiO<sub>2</sub>.

Finally, the third experiment was performed removing also the formic acid from the solution (i.e. only K<sub>2</sub>PtCl<sub>6</sub> precursor in deionized water). The results shown in Figure S2c indicate that the reduction process was slowed down by an order of magnitude, which emphasizes the role of the hole scavenger in the photoreduction of Pt<sup>4+</sup> to Pt<sup>0</sup>.

### 3. X-ray fluorescence (XRF) analysis

Pt content in TiO<sub>2</sub> after the photodeposition was determined by XRF spectroscopy on M4 Tornado spectrometer (Bruker, Billerica, MA, USA) with an XFlash 430 detector in the range from 0 to 25 keV. The signal was collected from 20 different points of the sample, and the averaged value together with the standard deviation were calculated. The wt.% of Pt was derived based on the fluorescence signal of platinum and titanium assuming that only Pt and TiO<sub>2</sub> are present in the samples. The solution of Pt precursor does not significantly penetrate to TiO<sub>2</sub> without UV irradiation, while after 1 h under UV, the samples with ca. 2 wt.% Pt were obtained (Table S1).

**Table S1.** Pt content from XRF elemental analysis.

| Sample                 | Pt content, wt% |
|------------------------|-----------------|
| Without UV irradiation | 0.39 ± 0.09     |
| After 1 hour under UV  | 1.97 ± 0.47     |
